# Supplementary material for: Short communication: Cosmogenic noble gas depletion in soils by wildfire heating
Source: Copernicus journal article supplement (doi:10.5194/gchron-6-71-2024), 2024-02-21
Supplement: Supplementary file 1 [file CougarPassTableS1_all_nuclides.xlsx]

## Sheet: Sheet1
Table S1. 3He, 10Be, and 21Ne concentrations in quartz from Cougar Pass soil profile samples.
			Aliquot			[3He]					[10Be]			Excess 21Ne
Sample name	Depth (cm)	Aliquot	weight (g)			(Matoms/g)			CAMS ID		(Matoms/g)			(Matoms/g)
CP1	0-10	a	0.1596										2.84269	±	1.12736
		b	0.1573										2.25703	±	1.18437
		c	0.1614		0.443706	±	0.237648
		d	0.1457		0.253105	±	0.236407
		e	0.9962						BE53536	0.878294	±	0.0210685
CP2	10-20	a	0.1357										3.75966	±	1.16839
		b	0.1479										2.31403	±	0.948473
		c	0.1673		0.12564	±	0.220122
		d	0.1454		0.401327	±	0.223537
CP3	20-30	a	0.1607										4.18025	±	1.28418
		b	0.1787										2.33	±	1.15963
		c	0.1595		0.320006	±	0.231278
		d	0.1781		0.686609	±	0.193484
		e	2.0959						BE53537	0.856321	±	0.0168507
CP4	30-40	a	0.1679										2.53718	±	1.08898
		b	0.1401										2.53243	±	1.1027
		c	0.1682		0.464838	±	0.203641
		d	0.1574		0.23971	±	0.208967
		e	1.6106						BE53538	0.872101	±	0.0291986
CP5	40-52	a	0.1696										1.3654	±	1.20864
		b	0.1542										4.14494	±	1.33984
		c	0.1622		0.378368	±	0.204337
		d	0.1571		0.414911	±	0.20302
CP6	52-61	a	0.179										3.24653	±	1.29816
		b	0.1699										5.8326	±	1.10002
		c	0.1568		0.511972	±	0.223102
		d	0.174		0.324128	±	0.192853
		e	2.5381						BE53540	0.837255	±	0.0157209
CP7	61-70	a	0.1521										4.01041	±	1.12812
		b	0.1331										4.24302	±	1.26274
		c	0.1786		0.890035	±	0.193086
		d	2.2251						BE53542	0.949045	±	0.041219
CP8	70-79	a	0.1641										3.13513	±	0.971987
		b	0.1668										3.51836	±	1.14787
		c	0.1801		0.68136	±	0.202535
		d	0.168		0.384448	±	0.192789
		e	2.7803						BE53543	0.875283	±	0.0161832
CP9	79-89	a	0.1428										3.50759	±	1.12811
		b	0.167										1.90689	±	1.13015
		c	0.1566		0.849163	±	0.208793
		d	2.8101						BE53544	0.854727	±	0.0160134
CP10	89-99	a	0.1388										5.06475	±	1.16333
		b	0.1479										4.03397	±	1.2305
		c	0.1684		0.65294	±	0.208205
		d	0.1656		0.555348	±	0.214458
		e	2.4533						BE53545	0.835161	±	0.0289704
CP11	99-109	a	0.1611										3.82032	±	1.20442
		b	0.1432										3.11917	±	1.09069
		c	0.1844		0.65384	±	0.180934
		d	3.1136						BE53546	0.86386	±	0.016155
CP14	129-139	a	0.1572										5.82045	±	1.20329
		b	0.1696										5.45107	±	1.04129
		c	0.1753		1.00067	±	0.203397
		d	0.1457		0.70443	±	0.227625
		e	2.5371						BE53547	0.826371	±	0.0154929
CP17	159-169	a	0.1762										5.28602	±	1.04738
		b	0.1647										2.57923	±	1.08301
		c	0.1738		0.489132	±	0.187814
		d	2.9623						BE53548	0.842398	±	0.0181123
CP21	203-213	a	0.1639										5.63332	±	1.19218
		b	0.1555										4.5266	±	1.45887
		c	0.1572		0.636761	±	0.21028
		d	0.1668		0.830366	±	0.205896
		e	3.1422						BE53549	0.61287	±	0.0114998
CP24	234-244	a	0.169										5.9459	±	1.19915
		b	0.147										4.9996	±	1.49641
		c	0.1705		1.47043	±	0.211901
		d	2.1274						BE53550	0.492681	±	0.0095131
CP28	274-284	a	0.1614										3.43123	±	1.09725
		b	0.1821										3.86052	±	1.45774
		c	0.1651		1.60128	±	0.230698
		d	0.1613		1.74748	±	0.214873
		e	1.6132						BE53551	0.339528	±	0.00895506
