# Supplementary material for: Short communication: Cosmogenic noble gas depletion in soils by wildfire heating
Source: Copernicus journal article supplement (doi:10.5194/gchron-6-71-2024), 2024-02-21
Supplement: Supplementary file 1 [file gchron-6-71-2024-supplement.zip]

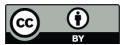

## *Supplement of*

# **Short communication: Cosmogenic noble gas depletion in soils by wildfire heating**

**Greg Balco et al.**

*Correspondence to:* Greg Balco (balco1@llnl.gov)

- gchron-6-71-2024-supplement-title-page.pdf
- Be\_Ne\_mixing\_model\_20230625.m
- CougarPassTableS1\_all\_nuclides.xlsx
- CougarPassTableS2\_Ne\_isotopes.xlsx
- Wildfire degassing - supplementary methods.pdf
- data21.mat

The copyright of individual parts of the supplement might differ from the article licence.
