# Supplementary material for: Short communication: Cosmogenic noble gas depletion in soils by wildfire heating
Source: Copernicus journal article supplement (doi:10.5194/gchron-6-71-2024), 2024-02-21
Supplement: Supplementary file 3 [file CougarPassTableS2_Ne_isotopes.xlsx]

## Sheet: Print table
Table S2. Step-degassing Ne isotope measurements for samples from Cougar Pass, OR soil profile. Run on BGC "Ohio" system, August 2021. Note: "n.d" = not detected.
			Heating	Heating																Excess 21Ne				Excess 21Ne as	Percent of total	Total
		Aliquot	temperature	time	Total 20Ne released1			Total 21Ne released2			Total 22Ne released3			21Ne / 20Ne4			22Ne / 20Ne4			This heating step				% of 21Ne released	excess 21Ne	excess 21Ne
Sample name	Aliquot	weight (g)	(deg C)	(hr)	(109 atoms)			(106 atoms)			(106 atoms)			(10-3)			(10-3)			(106 atoms g-1)				in this heating step	released in this step	(106 atoms g-1)
CP1	a	0.1596	850	0.25	1.4361	+/-	0.0235	4.591	+/-	0.151	142.337	+/-	2.612	3.205	+/-	0.092	99.3	+/-	1.3	2.14023	+/-	1.04162		7.44021	75.2889	2.84269	+/-	1.12736
			1100	0.2	0.1686	+/-	0.0101	0.611	+/-	0.062	16.283	+/-	1.162	3.595	+/-	0.415	96	+/-	8.7	0.70246	+/-	0.431247		18.349	24.7111
	b	0.1573	850	0.25	1.5803	+/-	0.0277	4.963	+/-	0.156	160.526	+/-	2.95	3.121	+/-	0.09	100.9	+/-	1.4	1.82385	+/-	1.12029		5.78062	80.8075	2.25703	+/-	1.18437
			1100	0.2	0.1473	+/-	0.0068	0.504	+/-	0.057	15.396	+/-	1.247	3.448	+/-	0.418	103.7	+/-	9.5	0.433181	+/-	0.38428		13.5197	19.1925
CP2	a	0.1357	850	0.25	1.0108	+/-	0.0182	3.36	+/-	0.14	103.298	+/-	2.367	3.331	+/-	0.13	102.4	+/-	2.1	2.71955	+/-	1.10539		10.9834	72.335	3.75966	+/-	1.16839
			1100	0.2	0.1108	+/-	0.007	0.469	+/-	0.047	12.844	+/-	1.111	4.154	+/-	0.486	114.9	+/-	12.1	1.04011	+/-	0.378495		30.0944	27.665
	b	0.1479	850	0.25	1.2206	+/-	0.0234	3.954	+/-	0.122	127.987	+/-	2.482	3.222	+/-	0.094	104.1	+/-	1.8	2.31403	+/-	0.948473		8.65566	100	2.31403	+/-	0.948473
			1100	0.2	0.1172	+/-	0.0078	0.391	+/-	0.05	12.424	+/-	1.178	3.364	+/-	0.48	105.1	+/-	12.1		n.d.			0	0
CP3	a	0.1607	850	0.25	1.6893	+/-	0.0275	5.571	+/-	0.176	171.071	+/-	3.268	3.29	+/-	0.088	101.3	+/-	1.4	3.56168	+/-	1.2066		10.2739	85.2024	4.18025	+/-	1.28418
			1100	0.2	0.205	+/-	0.0126	0.706	+/-	0.06	20.396	+/-	1.285	3.384	+/-	0.346	98.6	+/-	8.5	0.618575	+/-	0.439579		14.08	14.7976
	b	0.1787	850	0.25	2.0749	+/-	0.0347	6.556	+/-	0.18	208.632	+/-	3.379	3.145	+/-	0.075	99.9	+/-	1	2.33	+/-	1.15963		6.35099	100	2.33	+/-	1.15963
			1100	0.2	0.1497	+/-	0.0073	0.497	+/-	0.055	16.957	+/-	1.22	3.346	+/-	0.399	112.2	+/-	9.6		n.d.			0	0
CP4	a	0.1679	850	0.25	1.4888	+/-	0.0243	4.755	+/-	0.156	150.369	+/-	2.779	3.183	+/-	0.09	101	+/-	1.3	2.08243	+/-	1.02307		7.35312	82.0768	2.53718	+/-	1.08898
			1100	0.2	0.1354	+/-	0.008	0.477	+/-	0.058	14.115	+/-	1.159	3.459	+/-	0.462	103.2	+/-	10.3	0.454743	+/-	0.373107		16.0066	17.9232
	b	0.1401	850	0.25	1.2387	+/-	0.0227	3.925	+/-	0.126	127.233	+/-	2.346	3.156	+/-	0.095	102	+/-	1.6	1.85358	+/-	1.01917		6.61622	73.1937	2.53243	+/-	1.1027
			1100	0.2	0.1392	+/-	0.0072	0.507	+/-	0.055	15.408	+/-	1.151	3.669	+/-	0.437	109.5	+/-	9.8	0.678852	+/-	0.421		18.7588	26.8063
CP5	a	0.1696	850	0.25	1.5554	+/-	0.026	4.834	+/-	0.19	162.386	+/-	3.17	3.096	+/-	0.111	104.3	+/-	1.5	1.3654	+/-	1.20864		4.79047	100	1.3654	+/-	1.20864
			1100	0.2	0.1695	+/-	0.0072	0.537	+/-	0.058	19.751	+/-	1.296	3.114	+/-	0.354	115.4	+/-	8.8		n.d.			0	0
	b	0.1542	850	0.25	1.4976	+/-	0.0266	4.913	+/-	0.181	155.738	+/-	2.795	3.271	+/-	0.113	103.3	+/-	1.4	3.12323	+/-	1.27998		9.8026	75.3504	4.14494	+/-	1.33984
			1100	0.2	0.1475	+/-	0.0074	0.594	+/-	0.057	16.194	+/-	1.138	4.056	+/-	0.435	108.6	+/-	9.2	1.02171	+/-	0.395987		26.5231	24.6496
CP6	a	0.179	850	0.25	1.6471	+/-	0.0273	5.335	+/-	0.207	165.674	+/-	3.109	3.225	+/-	0.113	100.5	+/-	1.4	2.57671	+/-	1.24136		8.64538	79.3682	3.24653	+/-	1.29816
			1100	0.2	0.217	+/-	0.0108	0.762	+/-	0.06	22.274	+/-	1.387	3.448	+/-	0.311	101.6	+/-	7.9	0.669816	+/-	0.379776		15.7345	20.6318
	b	0.1699	850	0.25	1.7047	+/-	0.0209	5.831	+/-	0.166	172.634	+/-	2.909	3.447	+/-	0.089	100.7	+/-	1.5	4.63092	+/-	1.04265		13.4933	79.3971	5.8326	+/-	1.10002
			1100	0.2	0.126	+/-	0.0085	0.577	+/-	0.054	15.969	+/-	1.191	4.63	+/-	0.526	126.5	+/-	12.5	1.20168	+/-	0.350619		35.3841	20.6029
CP7	a	0.1521	850	0.25	1.2947	+/-	0.0218	4.441	+/-	0.159	129.351	+/-	2.298	3.411	+/-	0.109	99.7	+/-	1.2	4.01041	+/-	1.12812		13.7353	100	4.01041	+/-	1.12812
			1100	0.2	0.1414	+/-	0.0111	0.461	+/-	0.055	13.037	+/-	1.275	3.2	+/-	0.451	91.2	+/-	11.3		n.d.			0	0
	b	0.1331	850	0.25	1.1794	+/-	0.0144	3.969	+/-	0.152	121.906	+/-	2.048	3.392	+/-	0.123	102.8	+/-	1.5	3.59997	+/-	1.18602		12.0724	84.8445	4.24302	+/-	1.26274
			1100	0.2	0.1022	+/-	0.0077	0.388	+/-	0.053	11.98	+/-	1.153	3.841	+/-	0.592	117	+/-	14.1	0.643052	+/-	0.433433		22.0593	15.1555
CP8	a	0.1641	850	0.25	1.475	+/-	0.0252	4.879	+/-	0.141	151.706	+/-	3.031	3.288	+/-	0.079	102.6	+/-	1.6	3.13513	+/-	0.971987		10.5447	100	3.13513	+/-	0.971987
			1100	0.2	0.2128	+/-	0.0075	0.661	+/-	0.056	21.649	+/-	1.34	3.052	+/-	0.273	100.6	+/-	6.9		n.d.			0	0
	b	0.1668	850	0.25	1.8064	+/-	0.027	5.932	+/-	0.174	184.233	+/-	2.884	3.316	+/-	0.087	101.4	+/-	1	3.51836	+/-	1.14787		9.89316	100	3.51836	+/-	1.14787
			1100	0.2	0.1272	+/-	0.0072	0.408	+/-	0.053	15.02	+/-	1.156	3.251	+/-	0.458	117.2	+/-	11		n.d.			0	0
CP9	a	0.1428	850	0.25	1.2045	+/-	0.0215	4.065	+/-	0.148	118.687	+/-	2.386	3.355	+/-	0.112	98.3	+/-	1.7	3.50759	+/-	1.12811		12.3219	100	3.50759	+/-	1.12811
			1100	0.2	0.0867	+/-	0.0063	0.274	+/-	0.055	9.597	+/-	1.079	3.109	+/-	0.657	109.4	+/-	14.5		n.d.			0	0
	b	0.167	850	0.25	1.4152	+/-	0.0243	4.413	+/-	0.165	145.09	+/-	2.449	3.15	+/-	0.113	101.9	+/-	1.5	1.34984	+/-	1.07776		5.10816	70.7876	1.90689	+/-	1.13015
			1100	0.2	0.147	+/-	0.0069	0.528	+/-	0.053	16.541	+/-	1.165	3.638	+/-	0.399	111.6	+/-	9.2	0.557048	+/-	0.3401		17.6187	29.2124
CP10	a	0.1388	850	0.25	1.2119	+/-	0.0202	4.289	+/-	0.15	124.45	+/-	2.357	3.516	+/-	0.109	102.4	+/-	1.5	5.06475	+/-	1.16333		16.3905	100	5.06475	+/-	1.16333
			1100	0.2	0.0698	+/-	0.0069	0.236	+/-	0.045	7.543	+/-	1.101	3.325	+/-	0.715	106.8	+/-	18.8		n.d.			0	0
	b	0.1479	850	0.25	1.3666	+/-	0.0229	4.499	+/-	0.16	141.149	+/-	2.336	3.327	+/-	0.112	102.7	+/-	1.4	3.07796	+/-	1.17483		10.1185	76.301	4.03397	+/-	1.2305
			1100	0.2	0.0901	+/-	0.007	0.408	+/-	0.05	10.646	+/-	1.038	4.59	+/-	0.664	117.2	+/-	14.4	0.956011	+/-	0.365926		34.6554	23.699
CP11	a	0.1611	850	0.25	1.5257	+/-	0.0261	5.13	+/-	0.178	155.411	+/-	2.752	3.339	+/-	0.104	101.5	+/-	1.3	3.82032	+/-	1.20442		11.9971	100	3.82032	+/-	1.20442
			1100	0.2	0.1356	+/-	0.0074	0.452	+/-	0.052	14.37	+/-	1.159	3.28	+/-	0.415	104.7	+/-	10		n.d.			0	0
	b	0.1432	850	0.25	1.3455	+/-	0.0234	4.428	+/-	0.14	138.568	+/-	2.977	3.327	+/-	0.1	102.4	+/-	2	3.11917	+/-	1.09069		10.0873	100	3.11917	+/-	1.09069
			1100	0.2	0.1061	+/-	0.0071	0.34	+/-	0.053	11.391	+/-	1.144	3.243	+/-	0.549	106.4	+/-	12.7		n.d.			0	0
CP14	a	0.1572	850	0.25	1.4389	+/-	0.0239	5.039	+/-	0.164	146.559	+/-	2.667	3.476	+/-	0.098	101.5	+/-	1.3	4.97007	+/-	1.13612		15.505	85.3898	5.82045	+/-	1.20329
			1100	0.2	0.1434	+/-	0.0099	0.558	+/-	0.055	14.792	+/-	1.16	3.832	+/-	0.454	101.8	+/-	10.5	0.850378	+/-	0.396405		23.9569	14.6102
	b	0.1696	850	0.25	1.4889	+/-	0.0227	5.176	+/-	0.149	155.73	+/-	2.585	3.516	+/-	0.091	104	+/-	1.3	4.54213	+/-	0.963681		14.883	83.3254	5.45107	+/-	1.04129
			1100	0.2	0.1892	+/-	0.01	0.714	+/-	0.06	20.268	+/-	1.224	3.824	+/-	0.372	106.1	+/-	8.2	0.908946	+/-	0.394456		21.5906	16.6746
CP17	a	0.1762	850	0.25	1.6048	+/-	0.0286	5.68	+/-	0.164	161.156	+/-	2.702	3.51	+/-	0.088	100	+/-	1.3	5.28602	+/-	1.04738		16.3978	100	5.28602	+/-	1.04738
			1100	0.2	0.1653	+/-	0.0083	0.541	+/-	0.058	15.596	+/-	1.161	3.22	+/-	0.375	93.1	+/-	8.2		n.d.			0	0
	b	0.1647	850	0.25	1.4634	+/-	0.0229	4.755	+/-	0.165	149.906	+/-	2.868	3.264	+/-	0.108	102.1	+/-	1.5	2.57923	+/-	1.08301		8.93374	100	2.57923	+/-	1.08301
			1100	0.2	0.1781	+/-	0.0077	0.576	+/-	0.06	18.807	+/-	1.16	3.221	+/-	0.357	104.7	+/-	7.6		n.d.			0	0
CP21	a	0.1639	850	0.25	1.7288	+/-	0.0225	5.846	+/-	0.174	180.011	+/-	2.476	3.392	+/-	0.096	103.6	+/-	1.4	4.45687	+/-	1.13668		12.4954	79.1162	5.63332	+/-	1.19218
			1100	0.2	0.1883	+/-	0.0087	0.75	+/-	0.053	19.8	+/-	1.153	4.076	+/-	0.339	104.8	+/-	7.7	1.17645	+/-	0.359495		25.7094	20.8838
	b	0.1555	850	0.25	1.7177	+/-	0.0289	5.649	+/-	0.2	172.366	+/-	2.856	3.299	+/-	0.105	100.5	+/-	1.1	3.64197	+/-	1.39881		10.0252	80.4571	4.5266	+/-	1.45887
			1100	0.2	0.16	+/-	0.007	0.611	+/-	0.061	16.315	+/-	1.194	3.777	+/-	0.404	101.4	+/-	8.4	0.88463	+/-	0.414281		22.5139	19.5429
CP24	a	0.169	850	0.25	1.6682	+/-	0.0206	5.773	+/-	0.179	173.294	+/-	2.396	3.469	+/-	0.102	103.4	+/-	1.4	4.95146	+/-	1.1189		14.495	83.2751	5.9459	+/-	1.19915
			1100	0.2	0.221	+/-	0.0097	0.822	+/-	0.067	23.983	+/-	1.288	3.799	+/-	0.346	108.1	+/-	7.4	0.994444	+/-	0.431296		20.4454	16.7249
	b	0.147	850	0.25	1.5657	+/-	0.0264	5.275	+/-	0.196	158.672	+/-	2.999	3.343	+/-	0.116	100.7	+/-	1.4	4.36798	+/-	1.43533		12.1724	87.3667	4.9996	+/-	1.49641
			1100	0.2	0.167	+/-	0.0076	0.587	+/-	0.058	18.301	+/-	1.187	3.545	+/-	0.38	108.8	+/-	8.5	0.631612	+/-	0.423178		15.8172	12.6333
CP28	a	0.1614	850	0.25	1.9122	+/-	0.0234	6.212	+/-	0.163	195.056	+/-	2.778	3.255	+/-	0.079	101.5	+/-	1.4	3.43123	+/-	1.09725		8.91501	100	3.43123	+/-	1.09725
			1100	0.2	0.25	+/-	0.008	0.801	+/-	0.073	25.745	+/-	1.357	3.266	+/-	0.311	102.6	+/-	6.2		n.d.			0	0
	b	0.1821	850	0.25	2.6732	+/-	0.0442	8.613	+/-	0.231	271.927	+/-	4.434	3.199	+/-	0.074	101	+/-	1	3.86052	+/-	1.45774		8.16209	100	3.86052	+/-	1.45774
			1100	0.2	0.2837	+/-	0.0072	0.81	+/-	0.065	30.371	+/-	1.296	2.877	+/-	0.236	106.3	+/-	5		n.d.			0	0
1 Computed by comparison to 20Ne signal in air pipettes. 1-sigma uncertainty includes measurement uncertainty of 20Ne signal in this analysis and the reproducibility of the air pipette signal
2 Computed by comparison to 21Ne signal in air pipettes. 1-sigma uncertainty includes measurement uncertainty of 21Ne signal in this analysis and the reproducibility of the air pipette signal
3 Computed by comparison to 22Ne signal in air pipettes. 1-sigma uncertainty includes measurement uncertainty of 21Ne signal in this analysis and the reproducibility of the air pipette signal
4 Isotope ratio measured internally during each analysis and corrected for mass discrimination when necessary based on an air standard.
